# Supplementary material
Source: MDPI journal article supplement (https://www.mdpi.com/2071-1050/10/1/110)
Supplement: s1 [file s1]

## Sheet: Sheet1
	Total Assets					GHG Emissions					Wells Drilled					Revenue					Operational Expense					Oil Production					Natural Gas Production
Company	2015	2014	2013	2012	2011	2015	2014	2013	2012	2011	2015	2014	2013	2012	2011	2015	2014	2013	2012	2011	2015	2014	2013	2012	2011	2015	2014	2013	2012	2011	2015	2014	2013	2012	2011
unit	million ＄	million ＄	million ＄	million ＄	million ＄	tons	tons	tons	tons	tons						million ＄	million ＄	million ＄	million ＄	million ＄	million $	million $	million $	million $	million $	MBbls/d	MBbls/d	MBbls/d	MBbls/d	MBbls/d	MMcf/d	MMcf/d	MMcf/d	MMcf/d	MMcf/d
Anadarko Petroleum Corporation	46414	60967	55781	52589	51779	2449223	3257534	3295027	2892433	3578625	602.9	854.6	946.9	1015.5	1257.1	8698	18470	14581	13411	13967	17507	13067	11248	9684	15837	232.877	202.74	158.904	147.945	131.507	2339.73	2605.48	2643.84	2509.59	2334.25
Antero Resources LLC	14155.2	11573.5	6613.58	3618.79	3788.8	423460	526429	526082	679643	332787	124	147	123	108	95	3954.86	2720.63	1313.13	735.718	691.353	2164.57	1420.9	971.927	291.703	160.37	5.69315	3.59178	0.619178	0.0520548	0.00547945	1202.74	868.493	484.932	238.356	123.288
Apache Corporation	18842	55952	61637	60737	52051	1016392	1501957	1528340	2021082	2355928	317	816.5	874.3	768.6	556.4	6366	12801	14438	17078	16888	19058	18302	11156	12201	8795	123.562	133.425	146.849	134.521	119.452	440	591.233	781.37	856.438	864.658
Berry Petroleum Company	3861.48	4967.41	5107.05	3325.4	2734.95	66872	62688	1540781	1141907	988726	196	411	311	439	371	641.654	1431.29	1111.3	1041.13	935.235	1579.03	1319.63	919.599	656.894	1217.08	30.0356	36.6959	30.7068	27.4685	24.7699	92.7452	79.2822	51.389	54.2027	65.4986
Bill Barrett Corporation	1506.52	2234.05	2369.28	2852.11	2687.93	305688	300470	552870	982411	897008	314.7	461.6	85.8	222.9	196.1	207.892	472.291	568.093	700.195	785.624	913.904	568.419	748.07	676.986	663.969	12.0575	10.9918	9.57534	7.36164	4.08219	21.2712	59.5726	144.342	278.044	268.099
Cabot Oil & Gas Corparation	5261.9	5437.72	4981.08	4616.31	4331.49	544077	398368	530532	1249440	1078784	132.8	176.5	153.5	117.8	96	1357.15	2173.01	1746.28	1204.55	979.864	1457.79	2087.03	1217.15	949.048	736.396	16.7014	10.8521	8.82466	6.59452	3.95342	1550.68	1391.78	1080	693.699	489.863
Chesapeake Energy Corporation	17357	40751	41782	41611	41835	4579778	5201341	5279462	4439067	4605383	428	682	985	1272	1282	12764	23125	19080	12316	11635	31683	19648	15437	14010	8714	113.973	115.89	112.329	84.9315	46.5753	2931.51	3000	3000	3093.15	2750.68
Cimarex Energy Co.	5243	8725	7253	6305	5358	1743076	1668346	1427359	1142073	881167	100.4	173.7	185.4	192	173.5	1452.62	2424.18	1998.05	1623.94	1757.89	5193.42	1610.24	1076.54	1030.93	901.403	51.1315	42.8466	36.6575	31.5507	26.789	462.978	425.008	343.145	324.644	329.077
Continental Resources, Inc.	14919.8	15076	11841.6	9091.92	5584.74	1638439	1356965	952563	886859	2193000	270.5	388.5	295	281	247	2680.17	4801.62	3455.15	2572.52	1649.79	2904.17	2933.78	2009.38	1279.71	889.037	146.622	122	95.8603	68.6849	45.1205	450.559	313.137	240.356	175	100.468
Denbury Resources Inc.	5919.82	12727.8	11788.7	11139.3	10184.4	332308	375201	302667	197116	1479986	15	56	45.3	90.6	117.3	1257.56	2435.2	2517.13	2456.47	2309.32	7583.54	1412.65	1874.75	1599.62	1385.28	69.1644	70.6055	66.2849	67.0192	60.737	22.1726	22.9562	23.7425	29.189	29.5425
Energen Corporation	4613.69	6138.26	6622.21	6175.89	5237.42	2904672	3371669	2887853	3177677	4824398	100.5	110.4	90	75.2	24.3	878.554	1679.21	1738.65	1540.82	1373.11	2316.41	1502.25	1387.45	1078.9	979.414	38.4192	32.3781	28.4329	24.0164	17.3096	97.5452	163.184	193.167	209.211	196.488
EOG Resources, Inc.	26975.2	34762.7	30574.2	27336.6	24838.8	4414805	5578324	5030329	4095510	3462137	481	869	864	826	857	8757.43	18035.3	14487.1	11682.6	10126.1	15443.5	12793.5	10811.9	10202.8	8012.81	283.288	282.044	212.14	149.677	102.008	924.11	954.521	937.808	1041.64	1138.9
EQT Corporation	13976.2	12035.4	9765.91	8819.75	8741.61	407514	331249	583037	267939	1746373	237.5	265.4	224.2	129.5	213.2	2339.76	2469.71	1862.01	1377.22	1323.83	1776.62	1650.46	1227.03	987.593	765.586	2.03562	1.23014	0.739726	0.726027	0.569863	1.53969	1.21862	5.05436	4.53213	1.90186
EXCO Resources, Inc.	954.126	2304.94	2399.84	2313.07	3779.06	326341	364095	549167	477054	596410	29.2	29.6	56.9	77.9	147.7	328.331	660.269	634.309	546.609	754.201	1695.58	569.042	455.088	1962.12	923.806	6.41644	6.12603	3.25479	1.92877	2.03014	301.167	335.134	420.058	500.395	484.11
Laredo Petroleum Holdings, Inc.	1813.29	3910.7	2606.61	2318.37	1615.38	229197	261140	122679	222304	151683	82.4	186.7	129.2	185.1	234.6	606.64	793.885	665.257	583.894	506.347	3078.15	567.499	450.906	411.954	303.827	20.8493	18.9068	15.0329	13.0822	9.2274	73.4685	79.3562	94.1041	107.255	86.8795
Linn Energy, LLC	9976.95	16423.5	16505	11451.2	7928.85	3500815	2853982	1044603	1001591	603485	305	699	306	225	188	2883.33	4983.3	2331.66	1774.24	1622.45	6304.49	3593.24	2590.27	1763.83	816.42	32.3808	36.1973	33.4247	29.3151	21.3699	549.282	492.247	443.836	350.685	175.342
Marathon Oil Corporation	32311	35983	35588	35269	31344	2205782	2215369	2071685	2152675	2129149	280	369	346	334	108	5861	11258	14959	16221	15282	8552	9659	9755	9872	10452	171	157	126	96	70	350.685	309.589	312.329	353.425	326.027
Murphy Oil Corporation	11493.8	16742.3	17509.5	17522.6	14138.1	430948	907497	1272764	641485	148758	111.8	189	176.8	107.5	33	3033.08	5476.08	5390.09	4619.6	4278.68	6315.34	4223.81	3917.4	3251.59	3110.81	60.8219	60	48.4932	26.0274	17.2603	87.3973	88.4932	53.1507	53.1507	47.1233
Newfield Exploration Company	4768	9580	9297	7884	8968	1013043	982304	674836	665449	1021011	136	345	313.3	263.4	359.8	1557	2288	1857	1562	1824	6618	1713	1370	2870	1227	58.4822	50.8137	38.9041	32.8438	29.9699	318.63	323.836	0.318082	0.393151	0.479726
Occidental Petroleum Corporation	43437	56259	69443	64210	60044	804924	1268481	1464230	1686906	1128164	408	479	667	731.2	1020.3	12699	21947	25736	24253	24119	1270	1503	1801	1602	1523	200	183.562	265.753	254.795	230.137	424.658	473.973	791.781	821.918	780.822
PDC Energy, Inc.	4485.8	2370.5	2331.1	1991.7	1777.9	566404	640367	631331	671980	563735	185.2	148.2	79.7	40.5	141.5	595.326	856.207	411.314	320.605	337.289	659.15	632.427	401.155	283.439	265.987	19.1342	11.8411	7.97178	5.44603	4.59096	91.2384	52.8712	57.1496	43.8044	36.6304
Pioneer Natural Resources Company	15154	14909	12272	13041	11422	626203	952883	855706	795001	1046742	334	639	553	751	787	4825	5072	3719.51	3072.52	2513.25	5246	3475	4281.23	2235	1917.18	964.614	937.274	1333.8	1178.1	1043.31	4572.25	5222.85	6020.49	6934.35	7327.46
QEP Resources, Inc.	8425.5	9286.8	9408.9	9108.5	7442.7	1780471	1948461	1780381	1499342	1473150	178.8	242.5	205.5	203.1	181	2018.6	3293.2	2935.8	2349.8	3159.2	2400.8	3991.9	2654.2	2484.3	2654.7	53.6986	46.8493	27.9718	17.2792	10.2501	496.164	491.233	599.726	683.014	647.671
Range Resources Corporation	6900.03	8704.6	7203.13	6685.6	5806.08	280829	138578	178219	213078	273786	141.3	239.1	208.6	256.8	265.7	1598.07	2426.06	1862.72	1457.7	1230.64	2650.43	1395.17	1713.14	1432.65	1152.38	11.189	11.1507	10.4849	7.81096	5.36986	993.663	786.099	724.734	593.301	397.825
SandRidge Energy, Inc.	2991.16	7259.23	7684.8	9790.73	6219.61	1625766	1462759	1424341	3672362	635778	124	502.9	530.9	957.9	886.6	768.709	1558.76	1983.39	2730.97	1415.21	5411.39	968.534	2152.39	2405.77	986.2	26.3014	29.7973	39.1205	43.474	27.3753	252.342	234.786	282.83	256.299	189.879
SM Energy Company	5621.6	6483.1	4678.1	4179	3784	648990	814830	754509	736013	652636	165.9	248	254.2	198.5	133	1556.96	2522.31	2293.37	1505.1	1603.32	2135.75	1356.49	1925.12	1525.12	1218.93	52.6027	45.7534	38.0822	28.4932	22.1918	475.616	418.904	408.219	328.767	274.795
Southwestern Energy Company	8110	14925	8048	6738	7903	1837864	1532879	1160325	1228778	1149972	347.5	478	258.1	270.7	308.3	3133	4038	3371.14	2729.99	2951.33	9655	2665	2167.52	3830.62	1878.11	6.20548	0.643836	0.378082	0.227397	0.265753	2463.01	2098.63	1797.26	1547.95	1367.12
Swift Energy Inc.	524.998	2173.35	2698.51	2473.46	2244.01	281412	227717	272474	207719	173091	17.1	31.5	46	66.2	39.6	244.721	549.456	587.713	557.29	599.131	1979.23	982.926	613.518	520.712	464.027	6.59233	9.61999	10.757	10.3393	10.5888	90.4027	116.117	90.4027	99.6868	87.1196
Ultra Petroleum Corporation	971.486	4225.69	2785.32	2007.35	4869.7	352732	291422	226673	160880	283572	150.1	89.9	54.3	52.2	113.9	839.111	1230.02	933.404	809.974	1101.8	3925.52	670.431	561.138	3655.25	642.032	0.00967945	0.00933973	0.00327671	0.00351233	0.00385753	0.73686	0.626074	0.616197	0.683041	0.648855
Whiting Petroleum Corporation	11389.1	13993.1	8802.5	7265.7	6037.5	2132445	2167997	836127	566592	520575	267.8	257.1	229.2	192.9	135	2050.8	3085.1	2828.39	2173.45	1899.62	4735.85	2712.39	2256.51	1511.44	1119.3	129.315	91.7808	73.9726	63.2877	50.137	112.603	82.7397	73.6986	70.6849	72.3288
WPX Energy, Inc.	8350	8778	8429	9456	10432	1480942	1361369	1401978	1451439	576842	136	353	330	367	693	1888	3493	2761	3189	3882	1092	1997	4509	3469	4024	35.8904	25.2055	16.1644	12.0548	7.39726	758.904	918.904	984.658	1115.07	1141.92
